# Supplementary material
Source: HighWire-hosted journal article supplement (https://www.jneurosci.org/highwire/filestream/599253/field_highwire_adjunct_files/0/Supplemental_Table.pdf)
Supplement: Supplemental_Table.pdf [file Supplemental_Table.pdf]

Supplemental Table 1. Average inactive lever presses across last two days of self-administration and extinction and during reinstatement (mean  $\pm$  sem).

| Experiment                     | Self-administration | Extinction     | Reinstatement   |
|--------------------------------|---------------------|----------------|-----------------|
| Heroin dialysis                | 6.8 $\pm$ 2.1       | 7.0 $\pm$ 1.7  | 16.8 $\pm$ 7.2  |
| Heroin TTX dialysis            | 5.8 $\pm$ 0.9       | 11.6 $\pm$ 4.0 | 19.9 $\pm$ 6.8  |
| Yoked-heroin                   | 4.2 $\pm$ 1.1       | N/A            | N/A             |
| Prelimbic infusions - dialysis | 4.6 $\pm$ 1.2       | 12.1 $\pm$ 2.0 | 20.9 $\pm$ 9.8  |
| Cue - dialysis                 | 6.5 $\pm$ 1.6       | 10.6 $\pm$ 2.9 | 8.1 $\pm$ 2.4   |
| CNQX                           | 4.3 $\pm$ 1.9       | 12.1 $\pm$ 5.3 | 18.7 $\pm$ 14.9 |
| Fluphenazine                   | 5.7 $\pm$ 3.7       | 12.4 $\pm$ 3.2 | 9.4 $\pm$ 2.9   |
| SCH                            | 1.6 $\pm$ 0.4       | 3.1 $\pm$ 1.5  | 2.0 $\pm$ 1.4   |
| Sulpiride                      | 1.3 $\pm$ 0.5       | 16.6 $\pm$ 5.7 | 7.3 $\pm$ 4.4   |
| Cue - fluphenazine + CNQX      | 5.8 $\pm$ 1.2       | 3.3 $\pm$ 0.4  | 5.7 $\pm$ 2.9   |
